# Supplementary material for: Titania nanotubes coated with graphene as a promising catalyst for the oxygen reduction reaction
Source: Royal Society of Chemistry journal article supplement (doi:10.1039/d0nj00547a), 2020-01-01
Supplement: d0nj00547a1.pdf [file d0nj00547a1.pdf]

**Electronic Supplementary Material (ESI) New Journal of Chemistry**  
**This journal is © New Journal of Chemistry 2020**

**Titania nanotubes coated with graphene as a promising catalyst for oxygen  
reduction reaction**

**Jiannan Cai<sup>1</sup>, Xiaofeng Zhang<sup>1</sup>, Yi Zhang<sup>1</sup>, Mingxing Yang<sup>1</sup>, Baohua Huang<sup>1</sup>, Shen Lin<sup>1,\*</sup>**

*<sup>1</sup>College of Chemistry and Materials Science, Fujian Normal University, Fuzhou, Fujian, China,  
350007*

**Table S1.** Structure Parameter of rGO/TiO<sub>2</sub>NTs, TiO<sub>2</sub>NTs, rGO and commercial TiO<sub>2</sub> Sample

| Sample                      | BET surface area<br>(m <sup>3</sup> g <sup>-1</sup> ) | Pore size<br>(nm) | Pore volume<br>(cm <sup>3</sup> g <sup>-1</sup> ) | Micropore<br>volume<br>(cm <sup>3</sup> g <sup>-1</sup> ) | Rmicro<br>(%) |
|-----------------------------|-------------------------------------------------------|-------------------|---------------------------------------------------|-----------------------------------------------------------|---------------|
| rGO/TiO <sub>2</sub> NTs    | 240.71                                                | 5.32623           | 0.320525                                          | 0.071169                                                  | 22.2%         |
| TiO <sub>2</sub> NTs        | 141.39                                                | 4.49122           | 0.15875                                           | 0.045129                                                  | 28.4%         |
| rGO                         | 184.09                                                | 5.07889           | 0.233744                                          | 0.023334                                                  | 10.0%         |
| Commercial TiO <sub>2</sub> | 78.59                                                 | 8.36195           | 0.175061                                          | 0.012068                                                  | 6.9%          |

**Table S2.** Comparison of ORR activity of rGO/TiO<sub>2</sub>NTs with other Ti doped carbon-based ORR catalysts reported before.

| Material                                                   | Onset<br>Potential/V | Cathodic<br>ORR<br>peak/V | Morphology              | Ref.                                   |
|------------------------------------------------------------|----------------------|---------------------------|-------------------------|----------------------------------------|
| (001)-TiO <sub>2</sub> -<br>x SC/rGO                       | 0.71 (RHE)           | -0.45(SCE)                | Truncated<br>bipyramids | Nat.Communi <sup>1</sup>               |
| TiO <sub>2</sub> /rGO                                      | -0.20 (SCE)          | -0.41 (SCE)               | Nanoparticles           | Int.J. Hydrogen.<br>energ <sup>2</sup> |
| N-doped<br>TiO <sub>2</sub> /npC<br>hybrid                 | 0.76 (RHE)           | N.A.                      | Sphere-like             | Acs.Appl.Mater.<br>inter <sup>3</sup>  |
| Co <sub>3</sub> O <sub>4</sub> (3)/h<br>m-TiO <sub>2</sub> | 0.7 (RHE)            | 0.65 (RHE)                | Two-dimensional         | Catalysts <sup>4</sup>                 |
| TiO <sub>2</sub> NT<br>arrays                              | -0.25<br>(Ag/AgCl)   | -0.4<br>(Ag/AgCl)         | Nanotubes               | Appl.Surf.Sci <sup>5</sup>             |
| rGO/TiO <sub>2</sub><br>NTs                                | 0.8 (RHE)            | 0.65 (RHE)                | Nanotubes               | This work                              |
| TiO <sub>2</sub> NTs                                       | 0.69 (RHE)           | 0.615(RHE)                | Nanotubes               | This work                              |
| rGO                                                        | 0.68 (RHE)           | 0.605(RHE)                | N.A.                    | This work                              |

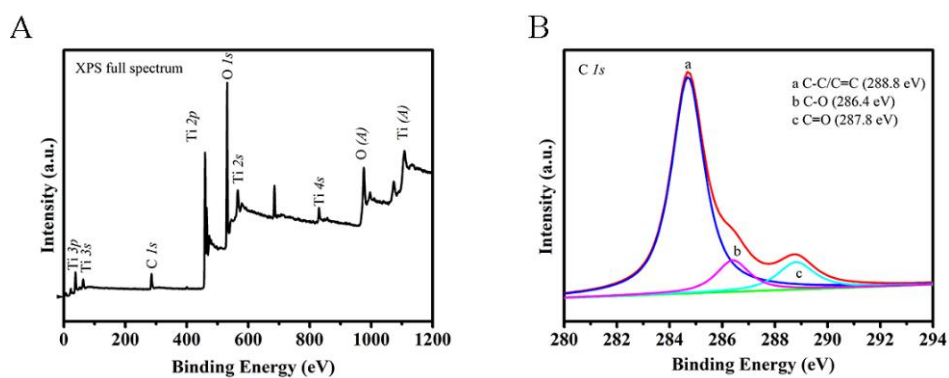

**Fig. S1** XPS spectra: Full scan of TiO<sub>2</sub>NTs composite (A), C1s spectrum of TiO<sub>2</sub>NTs composite (B)

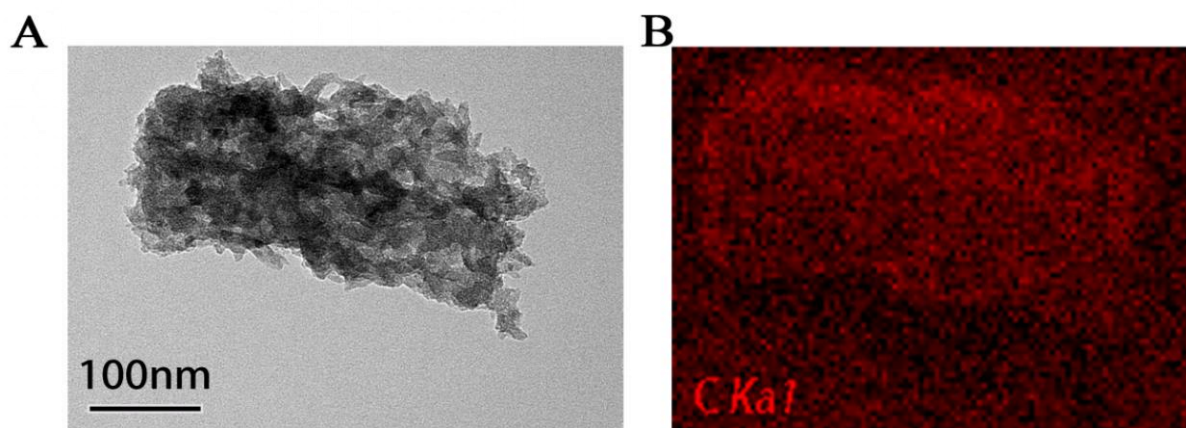

**Fig. S2** HRTEM (A) TEM-EDS mapping images of TiO<sub>2</sub>NTs composite (B).

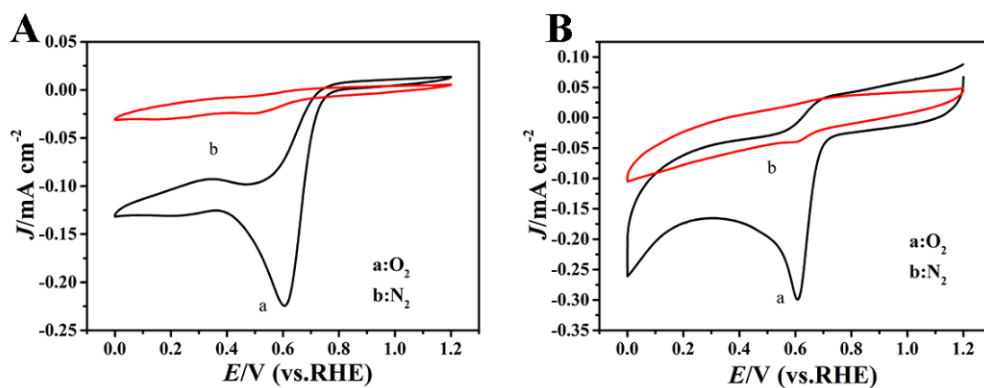

**Figure S3** Cyclic voltammograms of TiO<sub>2</sub>NTs(A), rGO (B) in N<sub>2</sub> and O<sub>2</sub>-saturated 0.1 M KOH solution at scanning rate of 10 mV s<sup>-1</sup>

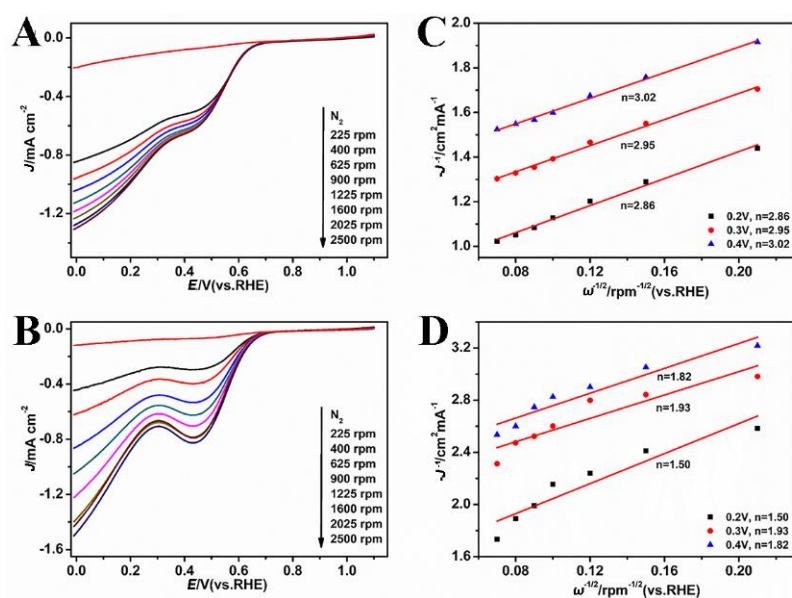

**Figure S4** LSV curves of different catalysts in O<sub>2</sub>-saturated 0.1 M KOH solution with various rotation rates at scanning rate of 10 mV s<sup>-1</sup> and Koutecky-Levich plots for different catalysts at different electrode potentials: (A, C) TiO<sub>2</sub>NTs, (B, D) rGO.

## Notes and references

1. Pei D-N, Gong L, Zhang A-Y, et al. Defective titanium dioxide single crystals exposed by high-energy {001} facets for efficient oxygen reduction. *Nature communications*. 2015;6(1):1-10.
2. Yu J, Liu Z, Zhai L, Huang T, Han J. Reduced graphene oxide supported TiO<sub>2</sub> as high performance catalysts for oxygen reduction reaction. *International Journal of Hydrogen Energy*. 2016;41(5):3436-3445.
3. Jin S, Li C, Shrestha LK, Yamauchi Y, Ariga K, Hill JP. Simple fabrication of titanium dioxide/N-doped carbon hybrid material as non-precious metal electrocatalyst for the oxygen reduction reaction. *ACS applied materials & interfaces*. 2017;9(22):18782-18789.
4. Amer MS, Ghanem MA, Arunachalam P, Al-Mayouf AM, Hadadi SM. Bifunctional Electrocatalyst of Low-Symmetry Mesoporous Titanium Dioxide Modified with Cobalt Oxide for Oxygen Evolution and Reduction Reactions. *Catalysts*. 2019;9(10):836.
5. Sacco A, Garino N, Lamberti A, Pirri CF, Quaglio M. Anodically-grown TiO<sub>2</sub> nanotubes: Effect of the crystallization on the catalytic activity toward the oxygen reduction reaction. *Applied Surface Science*. 2017;412:447-454.
